**Title:** A predictive model of fractional land use

**Authors:** Simon Kapitza<sup>1\*</sup>, Nick Golding<sup>2,3</sup>, & Brendan A. Wintle<sup>1</sup>

<sup>1</sup> *School of Biosciences, The University of Melbourne, Parkville VIC 3010, Australia*

<sup>2</sup> *Telethon Kids Institute, Perth Children's Hospital, 15 Hospital Ave, Nedlands WA 6009, Australia*

<sup>3</sup> *Curtin University, Kent St, Bentley WA 6102, Australia*

**Corresponding author email\*:** [simon.kapitza.research@gmail.com](mailto:simon.kapitza.research@gmail.com)

**Running headline:** A predictive model of fractional land use

# 1 Abstract

- 2 1. Land use change leads to shifts in species ranges and declines in biodiversity  
3 across the world. By mapping likely future land use under projections of socio-  
4 economic change, these ecological changes can be predicted to inform conservation  
5 decision-making.
- 6 2. We present a land use modelling approach that enables ecologists to map changes  
7 in land use under various socio-economic scenarios at fine spatial resolutions. Its  
8 predictions can be used as a direct input to virtually all existing spatially-explicit  
9 ecological models.
- 10 3. The most commonly used land use modelling approaches provide binary predic-  
11 tions of land use. However, continuous representations of land use have been  
12 shown to improve ecological models. Our approach maps the fractional cover of  
13 land use within each grid cell, providing higher information content than discrete  
14 classes at the same spatial resolution.
- 15 4. When parametrized using data from 1990, the method accurately reproduced  
16 land use patterns observed in the Amazon from 1990 until 2018. Predictions were  
17 accurate in terms of the fractional amounts allocated across the landscape and the  
18 correct identification of areas with declines and increases in different land uses. A  
19 small case study showcases the successful application of our model to reproduce  
20 patterns of agricultural expansion and habitat decline.
- 21 5. The model source code is provided as an open-source R package, making this new,  
22 open method available to ecologists to bridge the gap between socio-economic,  
23 land use and biodiversity modelling.

24 **Keywords:** Land use forecasting, fractional land cover, continuous fields, agricultural  
25 expansion, socio-economic change, biodiversity conservation, cross-validation, multino-  
26 mial regression

## 27 **Introduction**

28 Land use change is a key driver of global environmental change, causing global declines  
29 in biodiversity, species extinctions and resulting in the deterioration of ecosystem ser-  
30 vices (Foley, 2005; IPBES, 2019).

31 Land use change is driven by bio-physical and socio-economic processes (Lambin et al.,  
32 2011). Climate change will likely result in global shifts and declines of land suitable  
33 for agricultural production, with projected depletion of land reserves in the first half of  
34 the 21st century (Lambin et al., 2011). Most socio-economic scenarios of future change  
35 describe future increases in food production and international trade of goods (O'Neill  
36 et al., 2014, 2017). Even under lowest impact scenarios, also known as 'shared socio-  
37 economic pathways' (SSPs), in which land use is strongly regulated, deforestation rates  
38 are reduced, diets are more plant-based and climate change mitigation starts early, crop  
39 and livestock production are still likely to be higher and occupy a larger land area than  
40 they do today.

41 Despite mounting evidence of adverse environmental impacts of historic and current  
42 land use change, work concerned with understanding future biodiversity change tends to  
43 focus on climate change (Titeux et al., 2016; Struebig et al., 2015), or other aggregated  
44 effects of socio-economic change, such as forest loss (Margono et al., 2014) and urban  
45 expansion (Seto et al., 2012). Consequently, future predictions of biodiversity change  
46 will benefit from explicit accounting of the drivers and effects of land use change at the  
47 level of individual types of use. Detailed, large-scale mappings of future land use will

48 provide invaluable insights for researchers and policy makers, particularly in terms of  
49 conservation planning and preventing future biodiversity loss.

50 Different conceptual approaches have found application in investigations of past, present  
51 and future land use change. van Schrojenstein Lantman et al. (2011) identify four  
52 theoretical core principles for modelling land use change. Predictions can be made based  
53 on *the continuation of historical developments*, where past patterns are extrapolated  
54 into future conditions, the *suitability of land*, where land use changes are predicted  
55 based on proximity to markets, biophysical conditions and other environmental drivers,  
56 *neighbourhood interactions*, where neighbouring land uses affect local changes and *actor*  
57 *interactions*, where land use changes explicitly emerge from the decision-making of  
58 individual actors, or groups of actors.

59 These principals appear in many existing models. For example, artificial neural net-  
60 works and markov chain models learn and infer patterns from historic time series of  
61 land use change (Tayyebi and Pijanowski, 2014; Pijanowski et al., 2002). To allow  
62 for spatially-explicit assessments, markov chain models have been frequently combined  
63 with cellular automata (CA-Markov models, see Hyandye and Martz, 2017; Aburas  
64 et al., 2017; van Schrojenstein Lantman et al., 2011). In cellular automata the transi-  
65 tion probability of a cell to another land use depends on its current state and the state  
66 of neighbouring cells, both of which are the result of historic changes (van Schrojen-  
67 stein Lantman et al., 2011). Cellular automata have been used successfully to simulate  
68 strongly auto-correlated changes, such urban sprawl (Verburg et al., 2004b; Fang et al.,  
69 2005; Shafizadeh Moghadam and Helbich, 2013; Sun et al., 2007).

70 Some existing modelling approaches apply regression analysis and other techniques to  
71 identify associations between various environmental conditions and observed land-use  
72 patterns (Meiyappan et al., 2014; van Schrojenstein Lantman et al., 2011; Lambin et al.,

73 2000; Verburg et al., 2004b). Some of the most prominent examples include the Con-  
74 version of Land Use and its Effects (CLUE) model series, which have found application  
75 in the prediction of spatially-explicit patterns of land use at national and continental  
76 scales (Veldkamp and Fresco, 1996b; Verburg and Overmars, 2009; Verburg et al., 1999,  
77 2002; Kapitza et al., 2020). Exogenously determined future changes in area demands  
78 for different land uses, often predicted by an economic model (Aguilar et al., 2016),  
79 may be downscaled by establishing statistical relationships between observed land use  
80 and a set of socio-economic and bio-physical drivers of land use and land use change.  
81 Predicted land use suitability surfaces inform local competition for different land uses  
82 (Verburg et al., 2002; Meiyappan et al., 2014). Models can be further parametrized by  
83 including transition rules at local (cell) and landscape levels and constraints on overall  
84 turn-over through time. More simplistic models based on statistical analysis use an  
85 ordered allocation algorithm, in which competition between land uses is handled by  
86 ordering allocations in terms of perceived socio-economic value (Fuchs et al., 2013).

87 Modelling approaches based on statistical analysis are useful in particular because of  
88 their transparency and scalability from regional to continental levels. For example,  
89 Veldkamp and Fresco (1996a) show that relationships between land use and biophys-  
90 ical and human driving factors in Costa Rica act differently at different scales, high-  
91 lighting the importance of the model's capability to parametrize relationships in close  
92 consideration of the study area.

93 Most land use models apply statistical analyses of discrete land use classes using binary  
94 logistic regression to model the cell-wise probabilities of occurrence for each land use,  
95 independent of the probabilities of other land uses. The resulting probability of land  
96 use occurrence at a site produced by separate models is an incomplete representation  
97 of the underlying structure of land use probability, because it omits that occurrence

98 probabilities are dependent between land use types, and that the probabilities of all  
99 discrete classes must sum to one. For example, when a site has very high probability  
100 for urban land use, this implies relatively low probabilities for primary natural habitat,  
101 which separate, independent logistic regressions do not fully capture.

102 One step toward explicitly modelling competition between land uses is to apply multi-  
103 nomial regression, thus allowing for the prediction of conditional binary probabilities  
104 of multiple classes (Noszczyk, 2019). However, the classifier would still allocate the  
105 land use with the highest probability at a site. For many ecological considerations it  
106 is desirable to know individual probabilities of land use occurrence for each land use  
107 type in order to characterize the underlying continuous fractions occupied by different  
108 land use types within a classified site. A few model examples are capable of predicting  
109 continuous fractions of land use at very coarse resolutions (see Hasegawa et al., 2017;  
110 Meiyappan et al., 2014), but documented approaches are not yet available in a usable  
111 package suited to regional-continental scale.

112 Increasingly, categorical data sets are available at spatial resolutions of finer than  $1\text{km}^2$ .  
113 Three prominent examples include the CORINE Land Cover inventory (Bossard et al.,  
114 2000), which contains several time steps between 1990 and 2019 at 100m resolution for  
115 the European continent, global land cover mappings produced for the year 2010 through  
116 Copernicus Land Monitoring Service (European Union, 2019) at the same resolution,  
117 as well as global mappings of land cover in annual time steps between 1992 and 2018,  
118 produced under the European Space Agency's (ESA) Climate Change Initiative Land  
119 Cover (CCI-LC) project (ESA, 2019), available at 300m resolution.

120 However, the spatial variables that represent drivers of land use and biodiversity change  
121 are often not available over large spatial extents at fine resolutions above  $1\text{km}^2$  (Den-  
122 doncker et al., 2006), though this situation is changing. Global mapping and climatic

123 projections based on Global Circulation Models (Hijmans et al., 2005) and other drivers,  
124 such as soil properties (Global Soil Data Task Group, 2000), are all now mapped at  
125 1km<sup>2</sup> or better. Infrastructure such as roads (Center for International Earth Science  
126 Information Network - CIESIN - Columbia, 2013) and built-up areas (FAO, 1997) is typ-  
127 ically represented by geographic features, but can be converted to raster representation  
128 at fine resolutions.

129 Lowering the resolution of available land use data sets to fit the resolution of continental-  
130 or global-scale environmental covariates has the advantage of higher computational  
131 efficiency when simulating changes. Assigning a single category of land use on each  
132 larger pixel effectively eliminates sub-pixel information on land use (Seo et al., 2016),  
133 so this approach is not desirable. In order to retain information, it is preferable to  
134 calculate the fractions of land use covering each new cell, producing continuous fields  
135 of information and retaining information at sub-pixel level (Seo et al., 2016).

136 Mapped representations of land use fractions have high utility in down-stream ecolog-  
137 ical modelling applications because they preserve information on spatial heterogeneity  
138 within classes, thus providing a much more refined landscape representation. For ex-  
139 ample, many wide-ranging species may persist in landscapes if a certain proportion of  
140 the landscape is comprised of old forest. It has been shown that continuous fields of  
141 land use allow better estimation of biomass and biomass change (Xian et al., 2015) and  
142 are better able to explain variation in home range sizes (Bevanda et al., 2014) than  
143 categorical land use data. Continental-scale biodiversity assessments have shown that  
144 patterns are associated with high spatial-resolution fractional land use measures such  
145 as the regional aggregation of land use types, land cover diversity and land use covari-  
146 ates including land use intensity (Mouchet et al., 2015) and actual evapo-transpiration  
147 (Mouchet et al., 2015; Whittaker et al., 2006). Creating mappings of some of these co-

148 variates requires fine-scale mappings of fractional land use as principal input (Plutzer  
149 et al., 2016). The intensification of agriculture and forest harvesting are crucial fac-  
150 tors shaping biodiversity (Levers et al., 2014, 2016) that require inputs of crop type  
151 and vegetation composition within each spatial unit. These ecological considerations  
152 of the utility of fractional land cover and land use representations are underpinned by  
153 recent advancements in algorithms to produce high resolution mappings of fractional  
154 land cover from satellite data (Allred et al., 2020; Hill and Guerschman, 2020).

155 Here, we innovate a land use modelling approach that allows ecologists to incorporate  
156 fractional land use change into ecological modelling. An advantage of our approach  
157 compared to existing fractional land use modelling approaches is its ease of imple-  
158 mentation for ecologists trained in R (R Development Core Team, 2008) and its high  
159 scalability to high resolutions and large spatial extents with minimal parametrization  
160 requirements. The source code for our method is freely available as a small open  
161 source R package hosted on GitHub (<https://github.com/kapitzas/flutes>). As  
162 such, our approach contributes a new open method toward bridging the gap between  
163 socio-economic, land use and biodiversity modelling.

164 We provides a mathematical description of the developed fractional land use model  
165 and evaluate our model according to its ability to correctly estimate the direction and  
166 intensity of observed land use changes using a case study in the Brazilian Amazon.

## 167 **Materials and methods**

### 168 **Model description**

169 The model consists of two main components (Fig. 1). First, statistical analysis is used  
170 to determine how the suitability of the landscape for different land uses relates to a set



171 of environmental drivers of land use change, producing a suitability surface for each  
172 land use class (Fig. 1a). Second, fractional changes in additional land use demands  
173 are allocated iteratively in the landscape, scaling with the land use suitability surfaces  
174 (Fig. 1b). We utilize a cellular automaton to introduce cell-level allocation decisions  
175 that constrain the location and direction of land use changes according to three rules:

176 **Rule 1: Future land use supply meets additional demand**

177 Projections of land use demands may be provided through external models, such as  
178 Computational General Equilibrium (CGE) models (i.e. GTAP, Aguiar et al. (2016)),  
179 or through the analysis and extrapolation of historic patterns (Moulds et al., 2015).  
180 The model allocates additional demand by adding cell-level supply  $d_{i,k,t+1}$  in cell  $i$ ,  
181 land use  $k$  and time step  $t + 1$  to fractions  $q_{i,k,t}$  (Fig. 1b). The first model objective  
182 can be formulated:

$$\sum_{i=1}^N q_{i,k,t+1} = \sum_{i=1}^N (q_{i,k,t} + d_{i,k,t+1})$$
$$\sum_{i=1}^N d_{i,k,t+1} = D_{k,t+1}$$

183  $D_{k,t+1}$  is the additional landscape-wide supply and is at equilibrium with additional  
184 demand after the algorithm converges.

185 **Rule 2: Cell-level fractions must sum to 1**

186 The second model condition requires that supply  $d_{i,k,t+1}$  is allocated across cells in such  
187 a way that  $\sum_{k=1}^K q_{i,k,t+1} = 1$  (Fig. 1b).

188 **Rule 3: Allocations are determined by land use suitability**

189 The third model condition requires cell-level supply  $d_{i,k,t+1}$  to be distributed in such a  
190 way that the allocated amounts in each cell scale with a predicted probability surface  $s$ ,  
191 by modelling  $q_{i,k,t=0} \approx s_{i,k} = f^k(\mathbf{X}_i)$ , where  $X_i$  is a set of demographic and bio-physical  
192 drivers related to land use.  $f^k$  is a multinomial, multi-response model (Fig. 1a). The  
193 parameter estimation of this model is based on the first time step and predicted to the  
194 conditions of subsequent time steps.

195 The land use status in a cell's neighbourhood has been shown to play an important  
196 role in determining a cell's land use (Dendoncker et al., 2007; Mustafa et al., 2018; van  
197 Vliet et al., 2013; Verburg et al., 2004a). Our suitability model applies neighbourhood  
198 interactions by calculating autocovariates (Verburg et al., 2004a) and including these in  
199 the multinomial regression of the land use suitability model. Following Verburg et al.  
200 (2004a), our autocovariates measure the amount of clustering of land uses in the cell  
201 neighbourhood when compared to the entire landscape. We calculate autocovariates  
202 as enrichment factors  $F_{d,i,k,t} = \frac{\sum_{i \in d} (q_{i,k,t}) / N_d}{\sum_{i=1}^N (q_{i,k,t}) / N}$ . The numerator is the average fraction  
203 of land use  $k$  in the neighbourhood  $d$  of each central cell  $i$  and the denominator is  
204 the average fraction of land use  $k$  in the entire landscape  $N$ . Here, we only included  
205 neighbourhood characteristics in the  $3 \times 3$  neighbourhood around each central cell, but  
206 other neighbourhoods are possible (Verburg et al., 2004a). When predicting suitability  
207 at each time step, the autocovariates are recalculated based on the assigned fractions  
208 from the previous timestep.

209 The response here is represented by fractional land use and not discrete classes normally  
210 required in multinomial regression. Therefore, we assume that underlying the land use  
211 fractions for each cell is a vector of counts  $c_{i,k,t}$  that sums to a total number of counts  
212  $C$  in each cell (e.g.  $C = 1e6$ ). We derive these counts through  $c_{i,k,t} \approx q_{i,k,t} * C$ . In

213 integer representation, the data are approximately proportional to the original fractions.  
214 When fitting the suitability model, parameter uncertainty depends on the assumption  
215 of  $C$ .  $C$  should be chosen to represent the degree of numerical precision in the observed  
216 fractions. I.e. if there are only 2 decimal places, setting  $C = 100$  results in counts that  
217 represent all of the information contained in the original fractions. Accordingly, the  
218 multinomial logit model takes the form

$$s_{i,k,t} = P(Y_i = k) = \frac{e^{\beta_k * X_{i,t} + \gamma_{d,k} * F_{d,i,k,t}}}{\sum_{k=1}^K e^{\beta_k * X_{i,t} + \gamma_{d,k} * F_{d,i,k,t}}}$$

219 where  $k$  is the reference land use class,  $\beta_k$  the estimated parameters in each class  
220 for covariates  $X_{i,t}$  and  $\gamma_{d,k}$  the estimated parameters for autocovariates  $F_{d,i,k,t}$ . We  
221 estimated parameters using R's 'nnet' package (Venables and Ripley, 2002). Predicted  
222 fractions satisfy  $\sum_{k=1}^K s_{i,k,t} = 1$ .

223 All software development and model validation was conducted in R (version 4.0.1) (R  
224 Development Core Team, 2008).

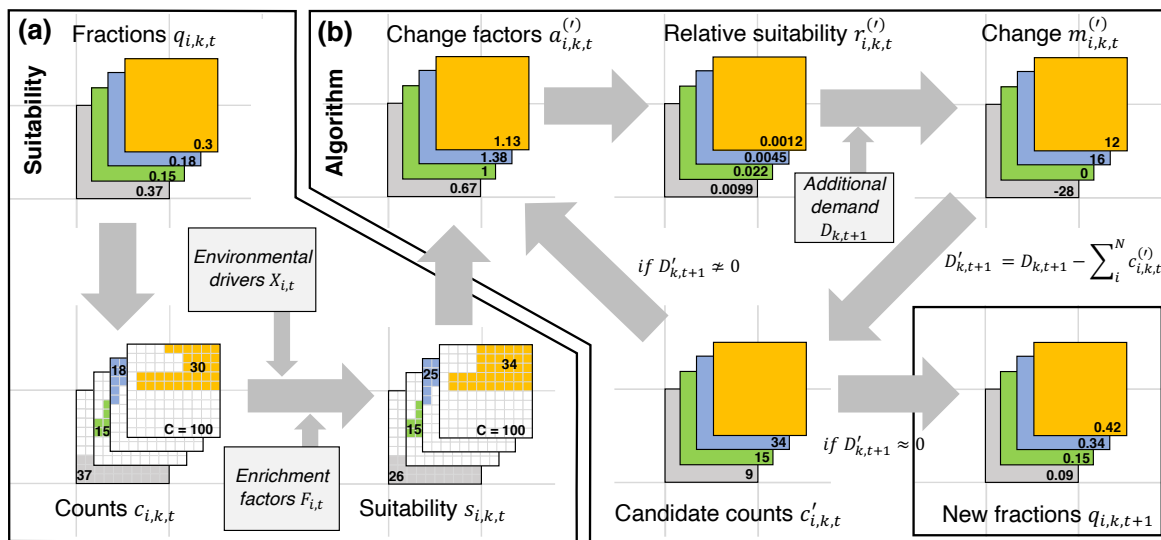

Figure 1: Conceptual diagram of land use modelling approach. a) Land use suitability model. Observed fractions of land use are first converted to integer counts through multinomial draws and their relationship with environmental drivers and neighbourhood covariates (derived from previous time step's land-use distribution) is assessed. b) Allocation algorithm. First it is estimated by how much each cell has to change to achieve the modelled ideal distribution of land uses. Change factors are then converted to relative suitabilities that serve to distribute land use supply required to satisfy the additional demand in the landscape. Multinomial draws assure that each cell's land use class probabilities sum to 1. The resulting difference of the current supply and the total additional demand is recalculated to support allocation in the next iteration. The cycle repeats until the difference between the current supply and total additional demand is very close to zero, meaning that all additional demand has been allocated. At this point, the integer counts representing the land use fractions on each cell are converted back to fractional representation

## 225 Data

226 We developed and tested our model using land use and environmental data from the  
 227 Amazon basin. We downloaded and cropped 7 time steps (1992, 1997, 2003, 2008, 2013,  
 228 2015 and 2018) of the global land cover mapping provided through the European Space  
 229 Agency's Climate Change Initiative Land Cover (CCI-LC) project (ESA, 2019). These  
 230 data are available at a grid resolution of 300m. We combined the recorded 31 land cover  
 231 classes to 9 new classes of land use we deemed crucial to identify processes leading to  
 232 agricultural expansion and declines in habitat (Table 1). We aggregated the resolution  
 233 to  $10\text{km}^2$ , calculating fractions of land use from the cell counts of each land use class on

234 the original map present in each new cell. Fractional land use in  $K$  classes is mapped  
 235 over  $N$  raster cells, with fractions  $q_{i,k,t}$  in cell  $i$  in each land use class  $k$  always satisfying  
 236  $0 \leq q_{i,k,t} \leq 1$  and  $\sum_{k=1}^K q_{i,k,t} = 1$ .

Table 1: Mapping of original land use classes to new classes applied in this study

|   | New class       | Abbr. | CCI-LC class                         | Description                                                                                                     |
|---|-----------------|-------|--------------------------------------|-----------------------------------------------------------------------------------------------------------------|
| 1 | Cropland        | Cro   | 10, 11, 12, 20, 30                   | Rainfed and irrigated cropland, mosaic cropland with >50% cropland and natural vegetation (tree, shrub, grass)  |
| 2 | Cropland mosaic | CrM   | 40                                   | Mosaic cropland with <50% cropland and natural vegetation (tree, shrub, grass)                                  |
| 3 | Forest          | For   | 50, 60-62, 70, 80, 90, 100, 160, 170 | Forest, closed to open, with >15% canopy cover, Mosaic tree/shrub (>50%) / herbacious cover, Flooded tree cover |
| 4 | Grassland       | Gra   | 110, 130                             | Grassland and mosaic herbacious cover (>50%) / tree/shrub                                                       |
| 5 | Shrubland       | Shr   | 180                                  | Flooded shrub or herbacious cover                                                                               |
| 6 | Wetland         | Wet   | 190                                  | Settlement, Urban land uses                                                                                     |
| 7 | Urban           | Urb   | 120                                  | Closed to open and open shrubland                                                                               |
| 8 | Other           | Oth   | 140, 150, 151-153, 200-202, 220      | Lichen/mosses, sparse trees/shrubs/herbaceous vegetation, bare areas, snow/ice                                  |
| 9 | Inland water    | Wat   | 210                                  | Natural and artificial inland water bodies                                                                      |

237 We downloaded a set of spatially explicit climate, topographic soil and human covariates  
 238 (Table 2 for a full list of covariates), derived neighbourhood covariates from observed  
 239 land use in the first time step and estimated observed demand change by calculating  
 240 the landscape-wide mean fraction for each land use class in each observed time step.  
 241 All explanatory covariates were standardized to have mean 0 and standard deviation 1.  
 242 We removed covariates from correlated pairs (Spearman’s rank correlation coefficient  
 243  $> 0.7$ ), always retaining the covariate with the smaller average correlation with all  
 244 other covariates in order to maximise the amount of independent information in the  
 245 final data set used for fitting.

Table 2: List of covariates that were included in land use suitability model

| Type                             | Covariate name                      | Source                             |
|----------------------------------|-------------------------------------|------------------------------------|
| climate                          | Annual mean temperature             | Fick and Hijmans (2017)            |
|                                  | Mean diurnal range                  |                                    |
|                                  | Isothermality                       |                                    |
|                                  | Temperature seasonality             |                                    |
|                                  | Max. temperature of warmest month   |                                    |
|                                  | Min. temperature of coldest month   |                                    |
|                                  | Temperature annual range            |                                    |
|                                  | Mean temperature of wettest quarter |                                    |
|                                  | Mean temperature of driest quarter  |                                    |
|                                  | Mean temperature of warmest quarter |                                    |
|                                  | Mean temperature of coldest quarter |                                    |
|                                  | Annual precipitation                |                                    |
|                                  | Precipitation of wettest week       |                                    |
|                                  | Precipitation of driest week        |                                    |
|                                  | Precipitation of driest month       |                                    |
|                                  | Precipitation of wettest quarter    |                                    |
|                                  | Precipitation of driest quarter     |                                    |
| Precipitation of warmest quarter |                                     |                                    |
| Precipitation of coldest quarter |                                     |                                    |
| topographic                      | Roughness                           | Hijmans et al. (2005)              |
|                                  | Slope                               |                                    |
|                                  | Elevation                           |                                    |
|                                  | Distance to coast                   | Wessel and Smith (1996)            |
|                                  | Distance to lake                    |                                    |
| soil                             | Nitrogen Content                    | Global Soil Data Task Group (2000) |
|                                  | Available Water Content             |                                    |
|                                  | Carbon Density                      |                                    |
|                                  | Bulk Density                        |                                    |
| human                            | Distance to built-up areas          | FAO (1997)                         |
|                                  | Distance to highways                | CIESIN (2013)                      |
|                                  | Distance to private roads           |                                    |
|                                  | Distance to trails                  |                                    |
|                                  | Protected areas                     | IUCN and UNEP-WCMC (2014)          |

## 246 **Model constraints**

247 Analysing time series data, we determined that only very small percentages of cells  
248 change from being devoid of a particular land use to containing that land use within  
249 one time step (Table 3). Therefore, we added a constraint that land use increases  
250 are more likely to be applied to cells where the land use is already present. The  
251 constraint parameter was the percentage of cells in which a non-existent land use was  
252 newly established between time steps. For example, setting the constraint to 100%  
253 would allow increases of a land use in all cells that did not contain that land use in the  
254 previous time step.

255 We parametrized the constraint by determining the time series mean of the according  
256 percentages between all time steps for each class (Table 3). For example, throughout  
257 the simulation, we allowed *Cro* increases in 1.35% of the cells in which *Cro* was not  
258 present in the preceding time step (Table 3). From cells currently zero in a land use,  
259 we selected the ones for increases that had the highest predicted land use suitability for  
260 that land use.

261 We masked category I and II protected areas established up until 1992 from land use  
262 changes as has been shown previously (see Fig. 2 for a map of protected areas) (Verburg  
263 et al., 2002; IUCN and UNEP-WCMC, 2014; Kapitza et al., 2020).

## 264 **Validating the intensity and direction of predicted changes**

265 First, we examined the accuracy of the multinomial suitability model and how it is  
266 affected by spatial resolution and the included covariates. To account for spatial au-  
267 tocorrelation in the environmental covariates and land use time series, we conducted  
268 spatial-blocks cross-validation (Valavi et al., 2019) by separating the landscape into 9  
269 equal-sized spatial blocks. We fitted models using data from 8 of the 9 blocks and

Table 3: Share of cells (%) containing a land use that were completely void of that land use in preceding time step. Values derived from observed time series.

| Land use | 1996 | 2001 | 2006 | 2011 | 2016 | 2018 | mean |
|----------|------|------|------|------|------|------|------|
| Cro      | 1.75 | 1.66 | 4.49 | 0.08 | 0.06 | 0.07 | 1.35 |
| CrM      | 2.39 | 2.37 | 7.24 | 0.05 | 0.03 | 0.05 | 2.02 |
| For      | 0    | 0    | 0    | 0    | 0    | 0    | 0    |
| Gra      | 0.40 | 0.62 | 0.94 | 0.15 | 0.04 | 0.04 | 0.37 |
| Shr      | 0.62 | 0.90 | 1.44 | 0.15 | 0.07 | 0.06 | 0.54 |
| Wet      | 0.62 | 0.68 | 2.60 | 0.26 | 0.13 | 0.11 | 0.73 |
| Urb      | 0.36 | 0.61 | 1.12 | 0.16 | 0.28 | 0.02 | 0.43 |
| Oth      | 0.02 | 0.06 | 0.12 | 0.05 | 0.02 | 0.01 | 0.05 |
| Wat      | 0.81 | 0.35 | 1.19 | 0.02 | 0.01 | 0.01 | 0.40 |

270 predicted the model to the withheld block, until predictions were made for the en-  
 271 tire study area. We cross-validated suitability models at  $1\text{km}^2$  and  $10\text{km}^2$ , including  
 272 1) only environmental covariates, 2) only neighbourhood covariates and 3) both co-  
 273 variate types combined. We conducted correlation analysis and removed highly corre-  
 274 lated covariates from pairs, always keeping the covariate with the lower average cor-  
 275 relation with all other covariates in order to maximise the amount of independent  
 276 information retained in the covariate set. For each of the three models we measured  
 277 predictive performance by estimating cell-level Suitability Root Mean Squared Error  
 278 ( $\text{RMSE}_{\text{suit}}$ ) between the suitability surfaces  $s_{m,i,k,t}$  and the observed fractions  $o_{i,k,t}$ ,  
 279 following  $\text{RMSE}_{\text{suit},m,i,t} = \sqrt{\frac{1}{K} \sum_{k=1}^K (o_{i,k,t} - s_{m,i,k,t})^2}$  for each suitability model  $m$ .  
 280 Second, to validate the intensity of changes predicted by the allocation algorithm, we  
 281 assessed the accuracy of predictions of cell-level fractions under a null model, a naive  
 282 model, a semi-naive model and a fully parametrised model throughout the observed  
 283 time series. 1) Under the null model, we assumed no change of land use through time.  
 284 The null model served as reference to measure the improvements provided by each  
 285 additional model component. 2) Under the naive model we only allocated additional  
 286 demands, but scaled cell-level allocations with the average supply observed across the



287 entire landscape. This model assumes that suitability is not informative about where  
288 a change will happen and that allocations are equally likely to be anywhere in the  
289 landscape. 3) Under the semi-naive model, cell-level allocations were additionally scaled  
290 with the predicted suitability surfaces  $s_{i,k,t}$  (as illustrated in 1). 4) Under the full model,  
291 allocations were scaled with suitability surfaces  $s_{i,k,t}$  and all constraints (constraining  
292 most increases to cells where land use type already exists and masking protected areas  
293 from changes) were applied.

294 We calculated  $RMSE_{alloc}$  under each allocation model  $w$  to estimate how well  
295 the different model components simulated each cell-level vector of land use  
296 fractions  $q_{m,i,k,t}$  compared to the respective observed vectors  $o_{i,k,t}$ , following  
297  $RMSE_{alloc,w,i,t} = \sqrt{\frac{1}{K} \sum_{k=1}^K (o_{i,k,t} - q_{w,i,k,t})^2}$ .

298 Due to the squared term, RMSE cannot inform on whether the models correctly iden-  
299 tified the direction of change. Therefore, we estimated and validated the direction of  
300 cell-level changes (decreases, no change, increases) separately. We mapped these tran-  
301 sitions for each class between the time steps of the observed time series and the time  
302 steps of the time series simulated under each model. We calculated *overall difference*  
303 of each pair of corresponding maps to obtain an interpretable measure of similarity of  
304 predicted and observed direction of changes (Pontius and Millones, 2011; Pontius and  
305 Santacruz, 2014). Achieving high accuracy in these first two model goals would suggest  
306 that simulated patterns of land use change closely resemble observed patterns.

## 307 **Case study: agricultural expansion in the Amazon Basin**

308 The Amazon catchment is largest river basin in the world and occupies over one third  
309 of the South American land mass (Fig. 2a). As the world's most diverse tropical forest  
310 area, the basin hosts at least 10% of the world's known species (Da Silva et al., 2005).

311 The Amazon biome is threatened by a multitude of interacting factors. Ecosystem  
312 services, such as water supply, carbon storage and provision of species habitat are  
313 directly threatened by the effects of climate change and the increasing pressure on land,  
314 with projected severe reductions in water yields, carbon content and species habitat,  
315 which is particularly affected by changes in natural vegetation cover (Prüssmann et al.,  
316 2016). The primary uses for cleared forest land are pasture for cattle farming and  
317 industrial soy cropping (Nepstad et al., 2014; FAO, 2015). Between 1992 and 2018, the  
318 biome has seen significant increases in land required for cropping and pasture, as well  
319 as significant decreases in forest cover (Fig. 2b).

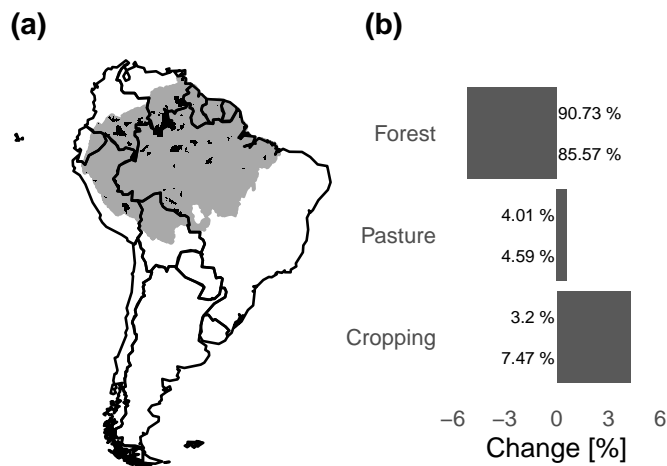

Figure 2: Overview of the study area. a) Location of the amazon catchment in South America (grey-shaded area), including IUCN protected areas (categories I and II) which were used to constrain land use changes (black shaded areas). b) Changes in selected land uses, derived from observed land use maps. Pasture includes Gra and Shr, Cropping includes Cro and CrM and forest includes For. Land use classes are specified in Table 1 below

320 Using a broad reclassification of the predicted and observed land use classes into crop-  
321 land, pasture and habitat, we were able to specifically validate our model's ability to  
322 predict agricultural expansion and habitat declines as aggregated threats to ecosystems  
323 and biodiversity. We assessed the accuracy of our predictions of cropland expansion

324 with simultaneous declines in classes containing natural habitats (*For*, *Wet* and *Oth*).  
325 We categorized the observed and predicted maps into 1) areas with no cropland in-  
326 crease, 2) areas where cropland increase led to mostly forest declines (net replacement  
327 of forest), and 3) areas where cropland increase led to mostly declines in other natural  
328 habitat classes (net replacement of other habitat). Similarly, we assessed the accu-  
329 racy of our predictions of pasture expansion on natural habitats by categorizing the  
330 landscape into 1) areas with no pasture increase, 2) areas where pasture increase led  
331 to mostly forest declines, and 3) areas where pasture increase led to mostly declines  
332 in other natural habitat classes. We assessed the difference between the respective  
333 observed and predicted maps by disaggregating overall difference into allocation and  
334 quantity difference components. This allowed us to further investigate whether predic-  
335 tion inaccuracies were due to error in the sum of allocated cells (quantity difference),  
336 or to errors in spatial location, discounting quantity difference (allocation difference)  
337 (Pontius and Millones, 2011).

## 338 **Results**

### 339 **Predicting land use change intensity**

340 Results of the cross-validation of the suitability model component show that including  
341 neighbourhood covariates resulted in substantial predictive performance improvements  
342 across spatial blocks (Fig. 3c) at both resolutions; models using neighbourhood co-  
343 variates alone were approximately as good as the model using the full covariate set.  
344 Including only environmental variables resulted in less accurate predictions at both  
345 resolutions, with predictions under the fine resolution comparatively worse than under  
346 the coarse resolution.

347 Under all tested models (naive, semi-naive, full), the accuracy of cell-level allocations  
348 improved with the intensity of observed changes (Fig. 3a). This implies that our model  
349 makes good predictions under scenarios with high expected overall changes. It is not  
350 surprising that large changes are easier to predict than small ones.

351 Where observed changes were large (Fig. 3a, bottom two panels), including land use  
352 suitability and constraints (full model) resulted in substantial increases of predictive  
353 performance. In these areas, the null model's assumption of no spatial variation in  
354 reallocation of land use introduced very high bias, which our constraints were able to  
355 reduce.

356 When observed changes were small (Fig. 3a, top two panels), the null model made  
357 near perfect predictions. Given how close the null model already was to the truth, im-  
358 provements by allocating demand (naive model) and accounting for land use suitability  
359 (semi-naive model) were difficult to achieve; in the smallest change category (Fig. 3a,  
360 top left panel), the naive and semi-naive predictions were in fact slightly worse than  
361 the null. In these areas the largest observed changes were below 0.5%, making the  
362 assumption of no change under the null model highly plausible. Under the full model,  
363 the applied constraint limited the areas that could be flagged for increases. Accord-  
364 ingly, where observed changes were small, this model made better predictions than the  
365 semi-naive and naive models, in which this constraint was not applied.

## 366 **Predicting the direction of land use changes**

367 The worst predictions of cell-level direction of change were made by the naive and  
368 semi-naive models and the best predictions under the full model (Fig. 3b), with over-  
369 all difference consistently less than 25%. Predictions became more accurate the more  
370 model components were applied. Under the full model we achieved the highest predic-

371 tion accuracy. Overall, the semi-naive model performed slightly better than the naive  
372 model, demonstrating the utility of scaling allocations with land use suitability surfaces.  
373 However, both naive and semi-naive predictions of change were generally less accurate  
374 than those under the full model. For areas with very small changes predictions tended  
375 to be worse than those under the null model. This was due to the large number of cells  
376 falling into the smallest category of observed change ( $\approx 60\%$  of cells when measured  
377 across the entire time series); in such areas, assuming the null model was more accurate  
378 than making naive and semi-informed allocations. In areas with intermediate levels of  
379 change (0.5%-30%), predictions under the different models were very similar, but the  
380 range of estimated RMSE was higher under the full model (indicated by wider error  
381 bars). This suggests that the full model outperformed the semi-naive and naive models  
382 in some areas, but fell comparatively short in others. This may be due to a larger  
383 number of cells at this level of observed change incorrectly prevented from increasing  
384 in land uses by the applied model constraints, while similarly a larger number of cells  
385 was correctly allowed to increase by the model.

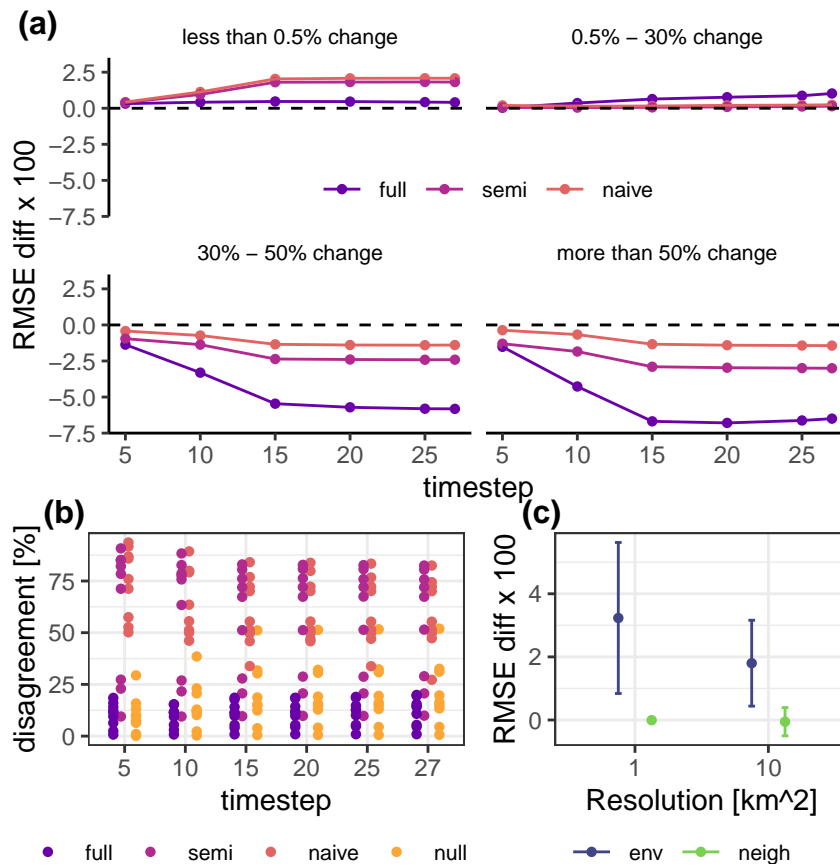

Figure 3: Validation of predicted land use change intensity and direction of change and cross-validation of suitability model. a) The difference between RMSE for each model (naive, semi-naive, full) and RMSE of the null model. The null model assumes that land use is static through time, the naive model assumes completely random allocations, the semi-naive model assumes that allocations are scaled with land use suitability and the full model assumes that allocations are both scaled with land use suitability and subject to model constraints (no changes in areas under high protection status and no land use increases in areas completely devoid of that land use). All RMSE were calculated at cell-level, using the predicted and observed vectors of land use fractions in each cell. Plotted are means and standard deviations across cells. Positive values indicate better fits under the null model, negative values indicate better fit under more highly parametrised models. Data on validation outcomes are grouped by the magnitude of the largest observed proportional change in any land use within a cell. In general, the larger the observed change in land use, the better the parameterized models did compared with the null model. b) The proportional disagreement between predictions of the direction of change (no change, decrease, increase) for each land use and the observed direction of change at each time step. Smaller values indicate lower overall difference and higher similarity between corresponding maps. c) Difference between cross-validated RMSE estimated for suitability models containing only environmental covariates and only neighbourhood covariates and models containing both covariate types combined. Positive values indicate a poorer fit than the model containing both covariate types.

## 386 **Predicting agricultural expansion and habitat declines**

387 Our model achieved high accuracy when predicting cropland and pasture expansion  
388 on forest and other land use types containing natural habitats. The estimated overall  
389 difference between observed and predicted mappings was consistently around 9% when  
390 measuring the impacts of cropland expansion (Fig. 4a) and 16-18% when measuring  
391 the impacts of pasture expansion (Fig. 4b).

392 Comparing the spatial configuration of cropland expansion (Fig. 4c) and pasture ex-  
393 pansion (Fig. 4d) into natural habitats in the last validation time step, the number of  
394 cells falling into each category was very similar in both cases, but the spatial arrange-  
395 ment differed, illustrating the different relative contributions of quantity and allocation  
396 difference. The model overestimated cropland expansion and net forest loss in the  
397 central-north, east and south of the catchment, while small observed areas in the cen-  
398 ter of the catchment were slightly underpredicted. Cropland expansion leading to net  
399 losses in non-forest habitats were barely visible in both the observed and predicted  
400 maps. Pasture expansion leading to net forest loss was slightly underestimated in the  
401 north and east of the catchment, and slightly overestimated in the center-south. Pasture  
402 expansion leading to net losses in other habitat types was very small.

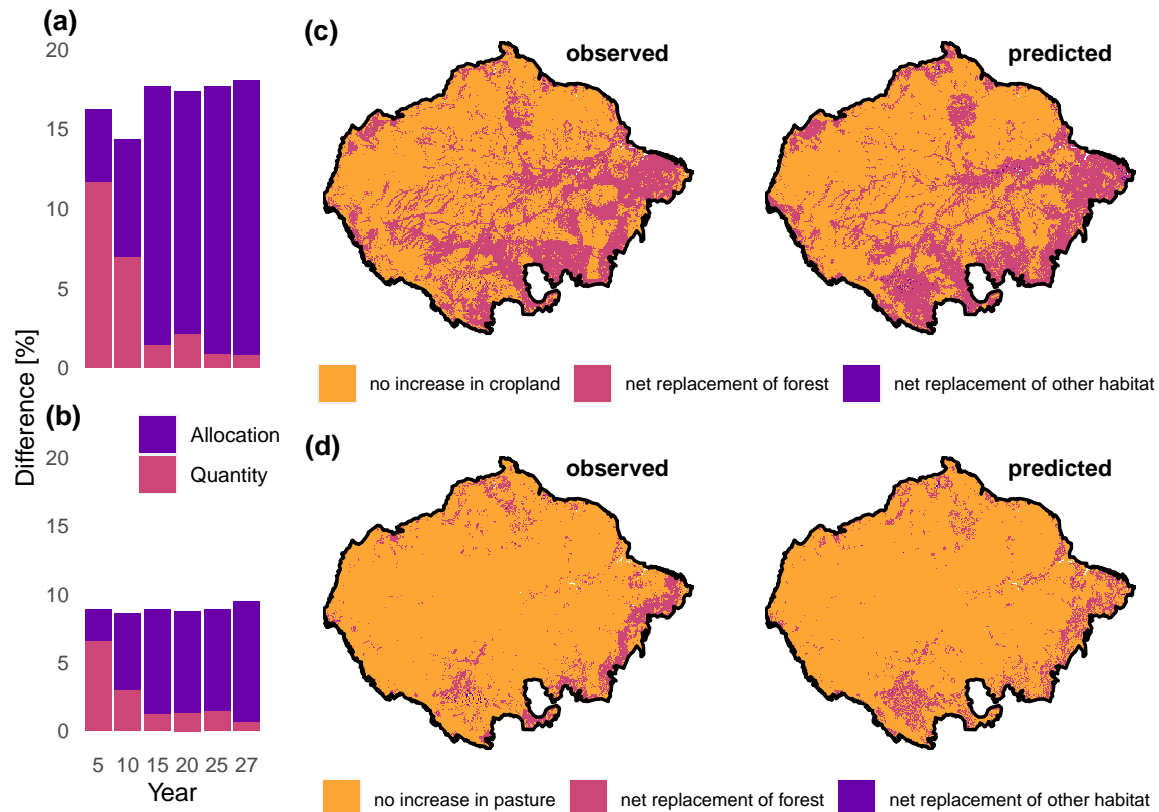

Figure 4: Validation of predictions of aggregated agricultural expansion and natural habitat decline in the Amazon basin. a,b) Quantity and allocation difference of observed and predicted mappings of agricultural expansion (a) and natural habitat decline (b), by time step. The overall difference is the sum of quantity and allocation difference. c) Maps of observed (left) and predicted (right) cropland expansion and habitat declines between 1992 and 2018. d) Map of observed (left) and predicted (right) pasture expansion and habitat declines. Quantity and allocation difference on these maps correspond to the respective last bars in panels a and b.

## 403 Discussion

404 We have presented a new land use model to predict land use fractions, thus retaining  
405 information at sub-pixel level. The model is able to accurately allocate fractions of  
406 land use through time, especially under scenarios of more extreme land use change. We  
407 explicitly accounted for competition between land use types and land use suitability in  
408 response to environmental drivers by means of a multinomial logistic model and could  
409 show that this aspect brings substantial improvements to predictions, when compared



410 the assumption that land use does not change at all (null model).

411 In scenarios where demand changes are expected to be high, our model allocates supply  
412 to match aggregated demand, changing the total area allocated to different land uses  
413 and also allowing land uses to be established in new areas. In scenarios with small  
414 expected demand changes, land use changes, including the establishment of land uses  
415 in new areas, remain small.

416 The initial land use distribution is likely to have resulted from long time periods of  
417 optimizing behaviour. For this reason, our model assumes that the land use distribution  
418 does not change to match predicted land use suitability alone. For example, if the  
419 modelled cropland suitability in an area is 0.8, but the observed cropland fraction  
420 is 0.2, there would only be a local increase in cropland if the aggregated demand for  
421 cropland at the study area level increased. The much lower realised fraction of cropland  
422 in that area when compared to the predicted suitability for cropland captures processes  
423 that are not captured by the suitability model.

424 Similar to CLUE, our constraint on turn-over accounted for conversion effort. Here,  
425 data from the observed validation time series allowed us to extract a raw estimate  
426 of the constraint parameter to tune our model. We estimated the parameter using  
427 long-term observed means, which we assume to be similarly informative as extensive  
428 literature review, inquiring expert opinion, or analyzing data from time series preceding  
429 the predicted time span, thus preventing overfitting.

430 We could show that our model is very easily adaptable to specific ecological study  
431 contexts. When validating our model's performance in the context of agricultural ex-  
432 pansion on natural habitat, we divided the difference between predicted and observed  
433 maps of agricultural expansion and habitat decline into the two components quantity  
434 and allocation difference. We were able to determine that the main sources of difference

435 between predicted and observed maps were spatial misallocations that increased with  
436 increasing time horizon. However, allocation difference was still very low, suggesting  
437 that our model can be a useful tool to predict the overall pressure and spatial config-  
438 uration of land use change impacts that are driven by different types of agricultural  
439 expansion into different habitat types.

440 Validating the suitability model component of our model approach, we found that  
441 neighbourhood covariates explained much of the suitability patterns across the land-  
442 scape. This is a common effect of including flexible spatial correlation terms in models  
443 with other spatially-varying covariates (spatial confounding) (Hodges and Reich, 2010).  
444 The models describe the spatial pattern with the spatial correlation term, but this effect  
445 does not imply causation and other drivers included in the model may still drive changes  
446 in the response, particularly over long time periods. Here, similar to what was shown by  
447 Dendoncker et al. (2007), including neighbourhood covariates lead to the most highly  
448 fitted models. Allowing spatial autocorrelation to drive patterns seems a sensible choice  
449 for predictions in this case study because the model only predicts three decades. How-  
450 ever, for longer time spans, spatial autocorrelation probably becomes less important  
451 and continental-scale environmental driving factors acting homogeneously across the  
452 whole landscape may dominate patterns in reality. When making such longer-term pre-  
453 dictions, this could be captured by fitting the suitability model with several time steps  
454 of data, thus assuring that land use suitability is less reliant on the present land use  
455 state, but more weight is given to long-term and large-scale environmental processes.

456 The results of our validation also strongly indicate that in case of our model, adding  
457 constraints (decision rules) in terms of where and how land use changes are allowed to  
458 occur, are responsible for the majority of increases in predictive performance. While  
459 we provide initial steps in parametrising these constraints, more specific knowledge of

460 bottom-up processes that drive land use stasis and change across the landscape could  
461 further consolidate the accuracy of our model. For example, this could be achieved  
462 by including data on the expected behaviour of economic agents who seek to max-  
463 imise returns on their productive land. One example includes the Land Use Trade-offs  
464 (LUTO) model (Bryan et al., 2014; Connor et al., 2015), which includes pixel-wise  
465 optimisation of cost and return of alternative land uses. However, such models are  
466 difficult to parametrise in data-scarce regions and require significant computational  
467 power. Bottom-up processes, such as price feedbacks, also tend to act at very fine spa-  
468 tial resolutions, but have little effect when seen at a continental scale, where scenario  
469 uncertainty and global processes dominate predictions (Connor et al., 2015). Depend-  
470 ing on scale, including very fine-scale dynamics of agent behaviour may simply not pay  
471 off, or it might be more appropriate to merely downscale them to the study area extent  
472 (Van Asselen and Verburg, 2013; Connor et al., 2015).

473 In order to allow scaling our model to global applications, we only used drivers that  
474 were available at global scales. However, improvements to the land use suitability  
475 model can be achieved by including more proximate drivers of land use change, such  
476 as market accessibility (Meiyappan et al., 2014; Verburg et al., 2011), by fitting the  
477 land use suitability model for individual subsets of the study area to improve local  
478 fit, or by creating more land use classes for which particular biophysical constraints  
479 are known. Including location-dependent drivers and models and raising the resolution  
480 may substantially improve the accuracy of land use suitability maps, increasing the  
481 contribution of this model component to overall prediction accuracy.

482 Our approach provides a validated method to spatially downscale future changes in  
483 land demands, and we highlight options to further improve its applicability in ecologi-  
484 cal studies. We hope that by providing open source code we can encourage ecologists to

485 include land use change in predictive studies and make further steps toward consolidat-  
486 ing quantitative methodological links between socio-economic and ecological systems.

## 487 **Acknowledgements**

488 This work received funding under the Australian Research Council Discovery grant  
489 DP170104795. NG was supported by an ARC DECRA fellowship (DE180100635). The  
490 authors acknowledge contributions made throughout the research phase by J. Elith and  
491 D. Zurell. SK was supported by the Melbourne International Research Scholarship  
492 (MIRS).

## 493 **Author contributions**

494 SK, BW conceived the idea of providing a fractional land use model. NG, SK and BW  
495 designed the model and validation. SK coded the model and analyzed the data. SK  
496 led the manuscript with edits from NG and BW.

## 497 **Data availability**

498 All inputs required to repeat this work will be made available through a FigShare repos-  
499 itory upon publication. An R package containing the model source code is available  
500 on GitHub (<https://github.com/kapitzas/flutes>). All code for data preprocessing and  
501 analysis is also provided through a GitHub repository ([https://github.com/kapitzas/fr](https://github.com/kapitzas/frac_lumodel)  
502 [ac\\_lumodel](#)). Both repositories will be receive permanent DOI through Zenodo upon  
503 publication.

## 504 References

- 505 Aburas, M. M., Ho, Y. M., Ramli, M. F., and Ash'aari, Z. H. (2017). Improving  
506 the capability of an integrated CA-Markov model to simulate spatio-temporal urban  
507 growth trends using an Analytical Hierarchy Process and Frequency Ratio. *Interna-*  
508 *tional Journal of Applied Earth Observation and Geoinformation*, 59:65–78.
- 509 Aguiar, A., Narayanan, B., and McDougall, R. (2016). An Overview of the GTAP 9  
510 Data Base. *Journal of Global Economic Analysis*, 1(1):181–208.
- 511 Allred, B. W., Bestelmeyer, B. T., Boyd, C. S., Brown, C., Davies, K. W., Ellsworth,  
512 L. M., Erickson, T. A., Fuhlendorf, S. D., Griffiths, T. V., Jansen, V., Jones, M. O.,  
513 Karl, J., Maestas, J. D., Maynard, J. J., McCord, S. E., Naugle, D. E., Starns, H. D.,  
514 Twidwell, D., and Uden, D. R. (2020). Improving Landsat predictions of rangeland  
515 fractional cover with multitask learning and uncertainty. Preprint, Ecology.
- 516 Bevanda, M., Horning, N., Reineking, B., Heurich, M., Wegmann, M., and Mueller,  
517 J. (2014). Adding structure to land cover – using fractional cover to study animal  
518 habitat use. *Movement Ecology*, 2(1):26.
- 519 Bossard, M., Feranec, J., and Otahel, J. (2000). CORINE land cover technical guide:  
520 Addendum 2000. Technical Report Technical report No 40, European Environment  
521 Agency.
- 522 Bryan, B. A., Nolan, M., Harwood, T. D., Connor, J. D., Navarro-Garcia, J., King,  
523 D., Summers, D. M., Newth, D., Cai, Y., Grigg, N., Harman, I., Crossman, N. D.,  
524 Grundy, M. J., Finnigan, J. J., Ferrier, S., Williams, K. J., Wilson, K. A., Law,  
525 E. A., and Hatfield-Dodds, S. (2014). Supply of carbon sequestration and biodiversity  
526 services from Australia's agricultural land under global change. *Global Environmental*  
527 *Change*, 28(1):166–181.

- 528 Center for International Earth Science Information Network - CIESIN - Columbia  
529 (2013). Global Roads Open Access Data Set, Version 1 (gROADSv1).
- 530 Connor, J. D., Bryan, B. A., Nolan, M., Stock, F., Gao, L., Dunstall, S., Graham,  
531 P., Ernst, A., Newth, D., Grundy, M., and Hatfield-Dodds, S. (2015). Modelling  
532 Australian land use competition and ecosystem services with food price feedbacks at  
533 high spatial resolution. *Environmental Modelling and Software*, 69:141–154.
- 534 Da Silva, J. M. C., Rylands, A. B., and da FONSECA, G. A. B. (2005). The Fate of  
535 the Amazonian Areas of Endemism. *Conservation Biology*, 19(3):689–694.
- 536 Dendoncker, N., Bogaert, P., and Rounsevell, M. (2006). A statistical method to  
537 downscale aggregated land use data and scenarios. *Journal of Land Use Science*,  
538 1(2-4):63–82.
- 539 Dendoncker, N., Rounsevell, M., and Bogaert, P. (2007). Spatial analysis and modelling  
540 of land use distributions in Belgium. *Computers, Environment and Urban Systems*,  
541 31(2):188–205.
- 542 ESA (2019). Land Cover CCI Version 2.0 and Version 2.1.1. Technical report.
- 543 European Union (2019). Copernicus Land Monitoring Service. Technical report, Euro-  
544 pean Environment Agency (EEA).
- 545 Fang, S., Gertner, G. Z., Sun, Z., and Anderson, A. A. (2005). The impact of interac-  
546 tions in spatial simulation of the dynamics of urban sprawl. *Landscape and Urban*  
547 *Planning*, 73(4):294–306.
- 548 FAO (1997). Built-up Areas of the World (Vmap0). First edit.
- 549 FAO (2015). AQUASTAT Transboundary River Basin Overview – Amazon. Technical  
550 report, Food and Agriculture Organization of the United Nations (FAO), Rome, Italy.

- 551 Fick, S. and Hijmans, R. (2017). WorldClim 2: New 1-km spatial resolution climate  
552 surfaces for global land areas. *International Journal of Climatology*, 37(12):4302–  
553 4315.
- 554 Foley, J. A. (2005). Global Consequences of Land Use. *Science*, 309(5734):570–574.
- 555 Fuchs, R., Herold, M., Verburg, P. H., and Clevers, J. G. (2013). A high-resolution and  
556 harmonized model approach for reconstructing and analysing historic land changes  
557 in Europe. *Biogeosciences*, 10(3):1543–1559.
- 558 Global Soil Data Task Group (2000). Global Gridded Surfaces of Selected Soil Charac-  
559 teristics (IGBP-DIS).
- 560 Hasegawa, T., Fujimori, S., Ito, A., Takahashi, K., and Masui, T. (2017). Global land-  
561 use allocation model linked to an integrated assessment model. *Science of The Total*  
562 *Environment*, 580:787–796.
- 563 Hijmans, R. J., Cameron, S. E., Parra, J. L., Jones, P. G., and Jarvis, A. (2005). Very  
564 high resolution interpolated climate surfaces for global land areas. *International*  
565 *Journal of Climatology*, 25(15):1965–1978.
- 566 Hill, M. J. and Guerschman, J. P. (2020). The MODIS Global Vegetation Fractional  
567 Cover Product 2001–2018: Characteristics of Vegetation Fractional Cover in Grass-  
568 lands and Savanna Woodlands. *Remote Sensing*, 12(3):406.
- 569 Hodges, J. S. and Reich, B. J. (2010). Adding Spatially-Correlated Errors Can Mess  
570 Up the Fixed Effect You Love. *The American Statistician*, 64(4):325–334.
- 571 Hyandye, C. and Martz, L. W. (2017). A Markovian and cellular automata land-use  
572 change predictive model of the Usangu Catchment. *International Journal of Remote*  
573 *Sensing*, 38(1):64–81.

574 IPBES (2019). *Summary for Policymakers of the Global Assessment Report on Biodi-*  
575 *versity and Ecosystem Services of the Intergovernmental Science-Policy Platform on*  
576 *Biodiversity and Ecosystem Services. Advance Unedited Version. Ngo, H. T.; Guèze,*  
577 *M.; Agard, J.; Arneth, A.; Balvanera, P.; Brauman, K.; Butchart, S.; Chan, K.;*  
578 *Garibaldi, L.; Ichii, K.; Liu, J.; Subramanian, S. M.; Midgley, G.; Miloslavich, P.;*  
579 *Molnár, Z.; Obura, D.; Pfaff, A.; Polasky, S.; Purvis, A.; Razzaque, J.; Reyers,*  
580 *B.; Chowdhury, R. R.; Shin, Y-J; Visseren- Hamakers, I.; Willis, K.; Zayas, C..*  
581 *Secretariat of the Intergovernmental Science-Policy Platform on Biodiversity and*  
582 *Ecosystem Services, Bonn, Germany.*

583 IUCN and UNEP-WCMC (2014). The World Database on Protected Areas (WDPA).  
584 Technical report, IUCN and UNEP-WCMC, Cambridge, UK.

585 Kapitza, S., Ha, P. V., Kompas, T., Golding, N., Bal, P., and Wintle, B. A. (2020).  
586 Assessing biophysical and socio-economic impacts of climate change on avian biodi-  
587 versity. *arXiv: 2002.02721*, page 39.

588 Lambin, E., Rounsevell, M., and Geist, H. (2000). Are agricultural land-use models able  
589 to predict changes in land-use intensity? *Agriculture, Ecosystems & Environment*,  
590 82(1-3):321–331.

591 Lambin, E. F., Meyfroidt, P., E. F. Lambin, and P. Meyfroidt (2011). Global land use  
592 change, economic globalization, and the looming land scarcity. *Proceedings of the*  
593 *National Academy of Sciences of the United States of America*, 108(9):3465–72.

594 Levers, C., Butsic, V., Verburg, P. H., Müller, D., and Kuemmerle, T. (2016). Drivers  
595 of changes in agricultural intensity in Europe. *Land Use Policy*, 58:380–393.

596 Levers, C., Verkerk, P. J., Müller, D., Verburg, P. H., Butsic, V., Leitão, P. J., Lindner,



- 597 M., and Kuemmerle, T. (2014). Drivers of forest harvesting intensity patterns in  
598 Europe. *Forest Ecology and Management*, 315:160–172.
- 599 Margono, B. A., Potapov, P. V., Turubanova, S., Stolle, F., and Hansen, M. C. (2014).  
600 Primary forest cover loss in Indonesia over 2000–2012. *Nature Climate Change*,  
601 4(8):730–735.
- 602 Meiyappan, P., Dalton, M., O’Neill, B. C., and Jain, A. K. (2014). Spatial modeling of  
603 agricultural land use change at global scale. *Ecological Modelling*, 291:152–174.
- 604 Mouchet, M., Levers, C., Zupan, L., Kuemmerle, T., Plutzer, C., Erb, K., Lavorel,  
605 S., Thuiller, W., and Haberl, H. (2015). Testing the Effectiveness of Environmental  
606 Variables to Explain European Terrestrial Vertebrate Species Richness across Biogeo-  
607 graphical Scales. *PLOS ONE*, 10(7):e0131924.
- 608 Moulds, S., Buytaert, W., and Mijic, A. (2015). An open and extensible framework  
609 for spatially explicit land use change modelling: The lulcc R package. *Geoscientific  
610 Model Development*, 8(10):3215–3229.
- 611 Mustafa, A., Heppenstall, A., Omrani, H., Saadi, I., Cools, M., and Teller, J. (2018).  
612 Modelling built-up expansion and densification with multinomial logistic regression,  
613 cellular automata and genetic algorithm. *Computers, Environment and Urban Sys-  
614 tems*, 67:147–156.
- 615 Nepstad, D., McGrath, D., Stickler, C., Alencar, A., Azevedo, A., Swette, B., Bezerra,  
616 T., DiGiano, M., Shimada, J., Seroa da Motta, R., Armijo, E., Castello, L., Brando,  
617 P., Hansen, M. C., McGrath-Horn, M., Carvalho, O., and Hess, L. (2014). Slowing  
618 Amazon deforestation through public policy and interventions in beef and soy supply  
619 chains. *Science*, 344(6188):1118–1123.

- 620 Noszczyk, T. (2019). A review of approaches to land use changes modeling. *Human*  
621 *and Ecological Risk Assessment: An International Journal*, 25(6):1377–1405.
- 622 O’Neill, B. C., Kriegler, E., Ebi, K. L., Kemp-Benedict, E., Riahi, K., Rothman, D. S.,  
623 van Ruijven, B. J., van Vuuren, D. P., Birkmann, J., Kok, K., Levy, M., and Solecki,  
624 W. (2017). The roads ahead: Narratives for shared socioeconomic pathways describ-  
625 ing world futures in the 21st century. *Global Environmental Change*, 42:169–180.
- 626 O’Neill, B. C., Kriegler, E., Riahi, K., Ebi, K. L., Hallegatte, S., Carter, T. R., Mathur,  
627 R., and van Vuuren, D. P. (2014). A new scenario framework for climate change re-  
628 search: The concept of shared socioeconomic pathways. *Climatic Change*, 122(3):387–  
629 400.
- 630 Pijanowski, B. C., Brown, D. G., Shellito, B. A., and Manik, G. A. (2002). Using  
631 neural networks and GIS to forecast land use changes: A Land Transformation Model.  
632 *Computers, Environment and Urban Systems*, 26(6):553–575.
- 633 Plutzar, C., Kroisleitner, C., Haberl, H., Fetzel, T., Bulgheroni, C., Beringer, T.,  
634 Hostert, P., Kastner, T., Kuemmerle, T., Lauk, C., Levers, C., Lindner, M., Moser,  
635 D., Müller, D., Niedertscheider, M., Paracchini, M. L., Schaphoff, S., Verburg, P. H.,  
636 Verkerk, P. J., and Erb, K.-H. (2016). Changes in the spatial patterns of human  
637 appropriation of net primary production (HANPP) in Europe 1990–2006. *Regional*  
638 *Environmental Change*, 16(5):1225–1238.
- 639 Pontius, R. G. and Millones, M. (2011). Death to Kappa: Birth of quantity disagree-  
640 ment and allocation disagreement for accuracy assessment. *International Journal of*  
641 *Remote Sensing*, 32(15):4407–4429.
- 642 Pontius, R. G. and Santacruz, A. (2014). Quantity, exchange, and shift components of

643 difference in a square contingency table. *International Journal of Remote Sensing*,  
644 35(21):7543–7554.

645 Prüssmann, J., Suárez, C., Guevara, O., and Vergara, A. (2016). Vulnerability and  
646 climate risk analysis of the Amazon biome and its protected areas. Technical report,  
647 Amazon Vision, REDPARQUES, WWF, UICN, FAO, PNUMA, Cali.

648 R Development Core Team (2008). R: A language and environment for statistical  
649 computing. Foundation for Statistical Computing.

650 Seo, B., Bogner, C., Koellner, T., and Reineking, B. (2016). Mapping Fractional Land  
651 Use and Land Cover in a Monsoon Region: The Effects of Data Processing Options.  
652 *IEEE Journal of Selected Topics in Applied Earth Observations and Remote Sensing*,  
653 9(9):3941–3956.

654 Seto, K. C., Guneralp, B., and Hutyrá, L. R. (2012). Global forecasts of urban expansion  
655 to 2030 and direct impacts on biodiversity and carbon pools. *Proceedings of the*  
656 *National Academy of Sciences*, 109(40):16083–16088.

657 Shafizadeh Moghadam, H. and Helbich, M. (2013). Spatiotemporal urbanization pro-  
658 cesses in the megacity of Mumbai, India: A Markov chains-cellular automata urban  
659 growth model. *Applied Geography*, 40:140–149.

660 Struebig, M. J., Fischer, M., Gaveau, D. L. A., Meijaard, E., Wich, S. A., Gonner, C.,  
661 Sykes, R., Wilting, A., and Kramer-Schadt, S. (2015). Anticipated climate and land-  
662 cover changes reveal refuge areas for Borneo’s orang-utans. *Global Change Biology*,  
663 21(8):2891–2904.

664 Sun, H., Forsythe, W., and Waters, N. (2007). Modeling Urban Land Use Change  
665 and Urban Sprawl: Calgary, Alberta, Canada. *Networks and Spatial Economics*,  
666 7(4):353–376.

- 667 Tayyebi, A. and Pijanowski, B. C. (2014). Modeling multiple land use changes using  
668 ANN, CART and MARS: Comparing tradeoffs in goodness of fit and explanatory  
669 power of data mining tools. *International Journal of Applied Earth Observation and*  
670 *Geoinformation*, 28(1):102–116.
- 671 Titeux, N., Henle, K., Mihoub, J.-B., Regos, A., Geijzendorffer, I. R., Cramer, W.,  
672 Verburg, P. H., and Brotons, L. (2016). Biodiversity scenarios neglect future land-  
673 use changes. *Global Change Biology*, 22(7):2505–2515.
- 674 Valavi, R., Elith, J., Lahoz-Monfort, J. J., and Guillera-Arroita, G. (2019). blockCV:  
675 An r package for generating spatially or environmentally separated folds for k-fold  
676 cross-validation of species distribution models. *Methods in Ecology and Evolution*,  
677 10(2):225–232.
- 678 Van Asselen, S. and Verburg, P. H. (2013). Land cover change or land-use intensification:  
679 Simulating land system change with a global-scale land change model. *Global Change*  
680 *Biology*, 19(12):3648–3667.
- 681 van Schrojenstein Lantman, J., Verburg, P. H., Bregt, A., and Geertman, S. (2011).  
682 Core Principles and Concepts in Land-Use Modelling: A Literature Review. In  
683 Koomen, E. and Borsboom-van Beurden, J., editors, *Land-Use Modelling in Planning*  
684 *Practice*, volume 101, pages 35–57. Springer Netherlands, Dordrecht.
- 685 van Vliet, J., Naus, N., van Lammeren, R. J., Bregt, A. K., Hurkens, J., and van  
686 Delden, H. (2013). Measuring the neighbourhood effect to calibrate land use models.  
687 *Computers, Environment and Urban Systems*, 41:55–64.
- 688 Veldkamp, A. and Fresco, L. (1996a). CLUE-CR: An integrated multi-scale model to  
689 simulate land use change scenarios in Costa Rica. *Ecological Modelling*, 91(1-3):231–  
690 248.

- 691 Veldkamp, A. and Fresco, L. O. (1996b). CLUE: A conceptual model to study the  
692 Conversion of Land Use and its Effects. *Ecological Modelling*, 85(2-3):253–270.
- 693 Venables, W. N. and Ripley, B. D. (2002). *Modern Applied Statistics with S*. Springer,  
694 New York, fourth edition.
- 695 Verburg, P. H., A Veldkamp, T., and Bouma, J. (1999). Land use change under condi-  
696 tions of high population pressure: The case of Java. *Global Environmental Change*,  
697 9(4):303–312.
- 698 Verburg, P. H., de Nijs, T. C., Ritsema van Eck, J., Visser, H., and de Jong, K. (2004a).  
699 A method to analyse neighbourhood characteristics of land use patterns. *Computers,*  
700 *Environment and Urban Systems*, 28(6):667–690.
- 701 Verburg, P. H., Ellis, E. C., and Letourneau, A. (2011). A global assessment of market  
702 accessibility and market influence for global environmental change studies. *Environ-*  
703 *mental Research Letters*, 6(3):034019.
- 704 Verburg, P. H. and Overmars, K. P. (2009). Combining top-down and bottom-up  
705 dynamics in land use modeling: Exploring the future of abandoned farmlands in  
706 Europe with the Dyna-CLUE model. *Landscape Ecology*, 24(9):1167–1181.
- 707 Verburg, P. H., Schot, P. P., Dijst, M. J., and Veldkamp, A. (2004b). Land use change  
708 modelling: Current practice and research priorities. *GeoJournal*, 61(4):309–324.
- 709 Verburg, P. H., Soepboer, W., Veldkamp, A., Limpiada, R., Espaldon, V., and Mastura,  
710 S. S. A. (2002). Modeling the spatial dynamics of regional land use: The CLUE-S  
711 model. *Environmental Management*, 30(3):391–405.
- 712 Wessel, P. and Smith, W. H. F. (1996). A global, self-consistent, hierarchical,  
713 high-resolution shoreline database. *Journal of Geophysical Research: Solid Earth*,  
714 101(B4):8741–8743.

715 Whittaker, R. J., Nogués-Bravo, D., and Araújo, M. B. (2006). Geographical gradients  
716 of species richness: A test of the water-energy conjecture of ) using European data  
717 for five taxa. *Global Ecology and Biogeography*, 0(0):061120101210013-???

718 Xian, G., Homer, C., Rigge, M., Shi, H., and Meyer, D. (2015). Characterization of  
719 shrubland ecosystem components as continuous fields in the northwest United States.  
720 *Remote Sensing of Environment*, 168:286–300.
